# Supplementary material for: The brittle-ductile transition in active volcanoes
Source: PubMed Central journal article supplement (PMC6333802; doi:10.1038/s41598-018-36505-x), 2019-01-15
Supplement: 41598_2018_36505_MOESM1_ESM.pdf [file 41598_2018_36505_MOESM1_ESM.pdf]

In accordance to Nature Publishing Groups Authorship Policy we agree to change the authors of the manuscript as indicated below.

**NAME OF JOURNAL:** Scientific Reports

**TITLE OF MANUSCRIPT:** The brittle-ductile transition in active volcanoes

**MANUSCRIPT NUMBER:** SREP-18-21767A

**CORRESPONDING AUTHORS NAME:** Francesco Parisio

**PREVIOUS AUTHOR NAMES:**

Francesco Parisio, Thomas Nagel, Olaf Kolditz, Sergio Vinciguerra

**UPDATED AUTHOR NAMES:**

Francesco Parisio, Sergio Vinciguerra, Olaf Kolditz, Thomas Nagel

**CHANGE TO AUTHOR LIST:** We have re-evaluated individual contributions and modified the authors list in accordance.

| Print Name         | Signature                                                                           | Date       |
|--------------------|-------------------------------------------------------------------------------------|------------|
| Francesco Parisio  |  | 08/10/2018 |
| Sergio Vinciguerra |  | 06/10/2018 |
| Olaf Kolditz       |  | 08/10/2018 |
| Thomas Nagel       |  | 08/10/2018 |
|                    |                                                                                     |            |
|                    |                                                                                     |            |
|                    |                                                                                     |            |
